# Supplementary material for: Pericyclic rearrangements of N-heterocyclic carbenes of indazole to substituted 9-aminoacridines
Source: Royal Society of Chemistry journal article supplement (doi:10.1039/c3ob40379c), 2013-01-01
Supplement: c3ob40379c.pdf [file c3ob40379c.pdf]

Supplementary Material (ESI) for Organic and Biomolecular Chemistry  
This journal is (c) The Royal Society of Chemistry 2012

**Pericyclic Rearrangements of *N*-Heterocyclic Carbenes of Indazole to  
Substituted 9-Aminoacridines**

**Zong Guan, Sascha Wiechmann, Martin Drafz, Eike Hübner, and Andreas Schmidt\***

*Clausthal University of Technology, Institute of Organic Chemistry, Leibnizstrasse 6,  
D-38678 Clausthal-Zellerfeld, Germany*

E-mail: schmidt@ioc.tu-clausthal.de

Calculations ..... S2- S12

Supplementary Material (ESI) for Organic and Biomolecular Chemistry  
This journal is (c) The Royal Society of Chemistry 2012

### Calculations

All density-functional theory (DFT)-calculations were carried out by using the Jaguar 7.7.107 software running on Linux 2.6.18-238.el5 SMP (x86\_64) on two AMD Phenom II X6 1090T processor workstations (Beowulf-cluster) parallelized with OpenMPI 1.3.4. MM2 optimized structures were used as starting geometries. Complete geometry optimizations were carried out on the implemented LACVP\* (Hay-Wadt effective core potential (ECP) basis on heavy atoms, N31G6\* for all other atoms) basis set and with the B3LYP density functional. All calculated structures were proven to be true minima or first order saddle points by the absence of imaginary frequencies or occurrence of one imaginary frequency, respectively. Plots were obtained using Maestro 9.1.207, the graphical interface of Jaguar.

Thermodynamic corrections were estimated from unscaled frequencies, using standard formulae in the ideal gas harmonic oscillator approximation as implemented in Jaguar, and refer to a standard state of 298.15 K and 1 mol/dm<sup>3</sup> concentration. Charges were obtained using the natural atomic orbital and natural bond orbital analysis which is included in Jaguar NBO 5.0.<sup>1</sup>

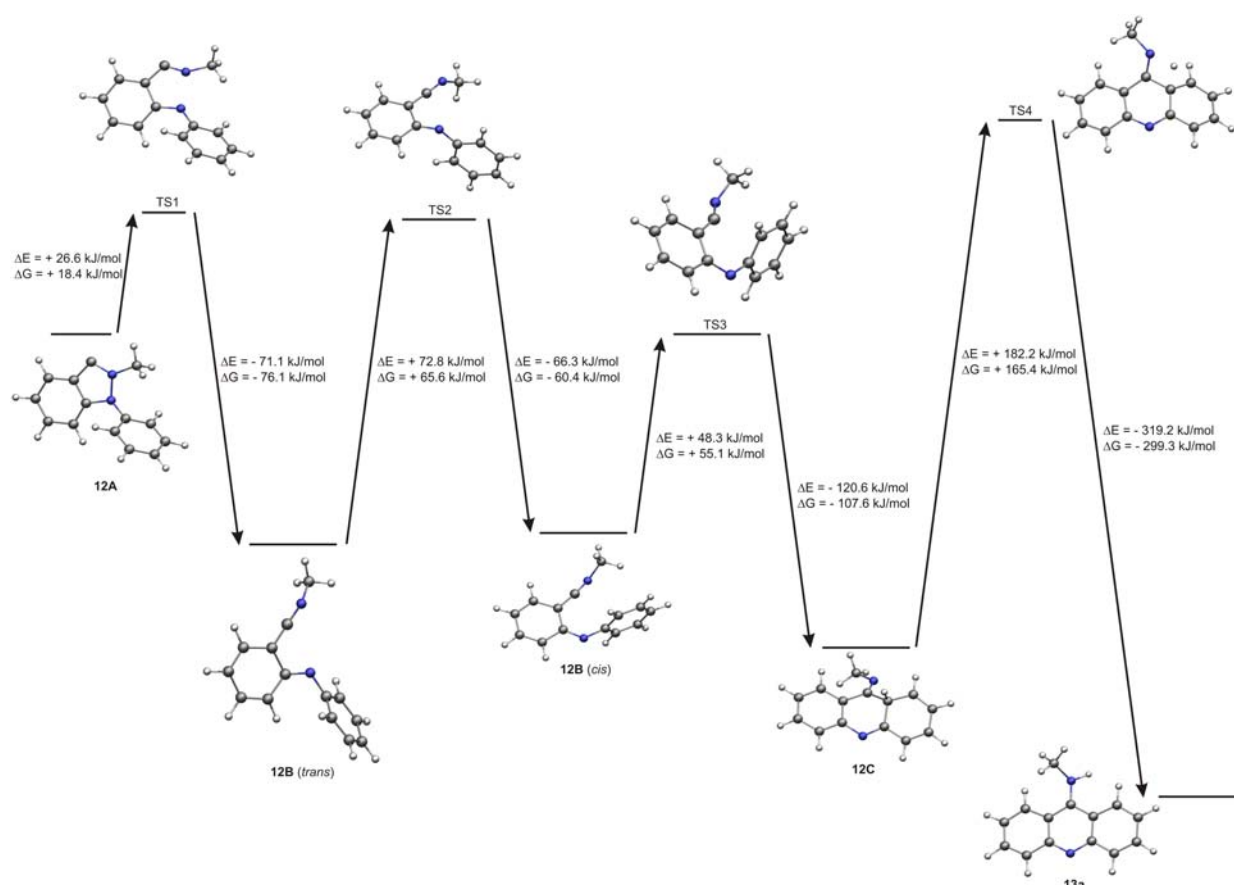

Figure 1. Energy profile of the rearrangement of **12A** to **13a**.

1. E. D. Glendening, J. K. Badenhoop, A. E. Reed, J. E. Carpenter, J. A. Bohmann, C. M. Morales, Weinhold (Theoretical Chemistry Institute, University of Wisconsin, Madison, WI, 2001); <http://www.chem.wisc.edu/~nbo5>

Supplementary Material (ESI) for Organic and Biomolecular Chemistry  
This journal is (c) The Royal Society of Chemistry 2012

Reactant:

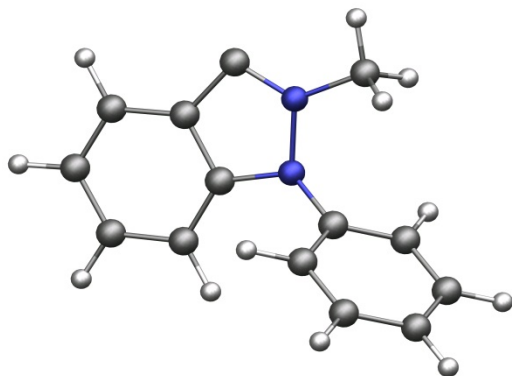

SCF-Energy: -650.116779, total Gibbs free energy (Htot-T\*S): -649.930222

Supplementary Material (ESI) for Organic and Biomolecular Chemistry  
This journal is (c) The Royal Society of Chemistry 2012

Coordinates:

|     |               |               |               |
|-----|---------------|---------------|---------------|
| C1  | -1.7111451354 | 2.7781423805  | -2.5347349407 |
| C2  | -1.2317898623 | 1.5463269354  | -3.0247841114 |
| C3  | -0.3862663947 | 0.7351328580  | -2.2746242855 |
| C4  | -0.0278461400 | 1.1946604386  | -1.0007859528 |
| C5  | -0.5082927041 | 2.4230290641  | -0.4796150082 |
| C6  | -1.3520294629 | 3.2200794928  | -1.2671789337 |
| N7  | 0.8203623049  | 0.6306560975  | -0.0702903415 |
| N8  | 0.7204529284  | 1.5448501498  | 1.0772174172  |
| C9  | 0.0003060336  | 2.6328192893  | 0.8673263045  |
| C10 | 1.0201149776  | -0.7704714778 | 0.1035871203  |
| C11 | -0.0721917137 | -1.6470622344 | 0.1849350934  |
| C12 | 0.1455753130  | -3.0147482768 | 0.3452670904  |
| C13 | 1.4476126389  | -3.5143326423 | 0.4374401284  |
| C14 | 2.5351919373  | -2.6415465017 | 0.3596824719  |
| C15 | 2.3245762453  | -1.2736463513 | 0.1848171931  |
| C16 | 1.5353459756  | 1.2369965831  | 2.2382449760  |
| H17 | -2.3673229116 | 3.3793961260  | -3.1571411675 |
| H18 | -1.5277087125 | 1.2205568373  | -4.0185705685 |
| H19 | -0.0193260973 | -0.2093717002 | -2.6640599584 |
| H20 | -1.7152606962 | 4.1645441209  | -0.8727219961 |
| H21 | -1.0803433652 | -1.2496107448 | 0.1179705391  |
| H22 | -0.7025034149 | -3.6909861088 | 0.4041643299  |
| H23 | 1.6134312905  | -4.5802279523 | 0.5648456602  |
| H24 | 3.5490317388  | -3.0264616319 | 0.4209999279  |
| H25 | 3.1618634753  | -0.5882503260 | 0.0959819736  |
| H26 | 1.3281513572  | 2.0175146568  | 2.9682407378  |
| H27 | 1.2746797320  | 0.2582925204  | 2.6527468332  |
| H28 | 2.6001307636  | 1.2426184128  | 1.9817435162  |

Supplementary Material (ESI) for Organic and Biomolecular Chemistry  
This journal is (c) The Royal Society of Chemistry 2012

TS1

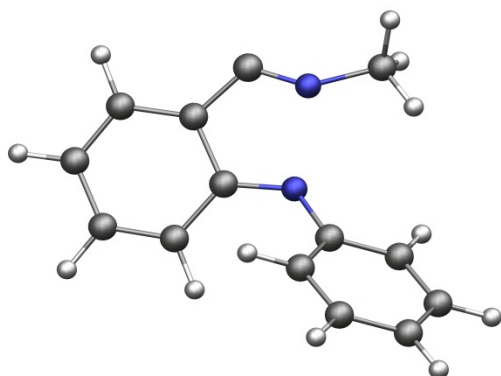

SCF-Energy: -650.106647, total Gibbs free energy (Htot-T\*S): -649.922924

Coordinates:

|     |               |               |               |
|-----|---------------|---------------|---------------|
| N1  | 0.0000000000  | 0.0000000000  | 0.0000000000  |
| N2  | 0.0000000000  | 0.0000000000  | 2.0705460003  |
| C3  | 2.1085675966  | 0.0000000000  | -1.2751465175 |
| C4  | 1.3324915801  | -0.0709706369 | -0.0847875197 |
| C5  | 2.0700540316  | -0.2910933894 | 1.1508248874  |
| C6  | 3.4655058035  | -0.4502337660 | 1.1588062538  |
| C7  | 4.1752357462  | -0.3847789700 | -0.0255545162 |
| C8  | 3.4806716549  | -0.1620633136 | -1.2342778135 |
| C9  | 1.1784776775  | -0.2847904958 | 2.2525708676  |
| C10 | -0.8179348437 | 0.7852530769  | -0.7982229167 |
| C11 | -0.4180682553 | 2.0332060952  | -1.3277941986 |
| C12 | -1.3027452540 | 2.7972186207  | -2.0819092081 |
| C13 | -2.6067458598 | 2.3513849488  | -2.3179810073 |
| C14 | -3.0176967208 | 1.1248535991  | -1.7901649829 |
| C15 | -2.1372666990 | 0.3488200689  | -1.0410082378 |
| C16 | -1.3174418279 | -0.2003958415 | 2.5960049049  |
| H17 | 5.2544675554  | -0.5018028565 | -0.0305535110 |
| H18 | 4.0391768079  | -0.1230724030 | -2.1670140152 |
| H19 | 1.5984997342  | 0.1507578008  | -2.2217183104 |
| H20 | 3.9677839090  | -0.6174647657 | 2.1069286267  |
| H21 | 0.5867342491  | 2.3945335022  | -1.1294351612 |
| H22 | -0.9762560425 | 3.7549125403  | -2.4806277789 |
| H23 | -3.2942862756 | 2.9547255001  | -2.9045003750 |
| H24 | -4.0284138612 | 0.7670497742  | -1.9706879042 |
| H25 | -2.4417914354 | -0.6160399099 | -0.6448837387 |
| H26 | -1.3733981086 | 0.2352515115  | 3.5989958780  |
| H27 | -2.0328628042 | 0.3086030722  | 1.9455827775  |
| H28 | -1.5652730947 | -1.2659829753 | 2.6461804040  |

Supplementary Material (ESI) for Organic and Biomolecular Chemistry  
This journal is (c) The Royal Society of Chemistry 2012

Intermediate 1, trans

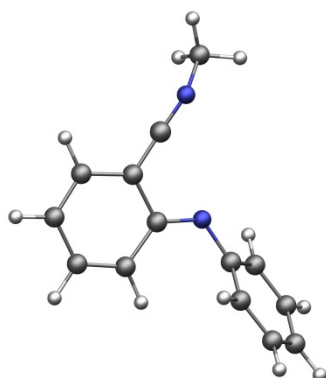

SCF-Energy: -650.133746, total Gibbs free energy (Htot-T\*S): -649.952062

Coordinates:

|     |               |               |               |
|-----|---------------|---------------|---------------|
| N1  | 0.0000000000  | 0.0000000000  | 0.0000000000  |
| N2  | 0.0000000000  | 0.0000000000  | 3.4933184883  |
| C3  | 2.3586100536  | 0.0000000000  | -0.7497172711 |
| C4  | 1.2824863945  | -0.0340987123 | 0.2317986805  |
| C5  | 1.7316673405  | -0.1908813033 | 1.6342269173  |
| C6  | 3.1284029384  | -0.3536912375 | 1.9631154451  |
| C7  | 4.0677659341  | -0.3284751961 | 0.9818713065  |
| C8  | 3.6617424845  | -0.1534000748 | -0.3878596754 |
| C9  | 0.7995542685  | -0.1592862067 | 2.6109594049  |
| C10 | -0.5337605591 | 0.3155023234  | -1.2504729128 |
| C11 | -0.1820666013 | 1.4789947539  | -1.9652722299 |
| C12 | -0.8085144766 | 1.7893858551  | -3.1710126965 |
| C13 | -1.7950646844 | 0.9520976675  | -3.6945526487 |
| C14 | -2.1609565981 | -0.1965418214 | -2.9870942134 |
| C15 | -1.5499365708 | -0.5058719007 | -1.7755399888 |
| C16 | -0.9099912455 | -0.9082817135 | 4.1717993805  |
| H17 | 5.1203482268  | -0.4434226243 | 1.2209367090  |
| H18 | 4.4284763709  | -0.1587814819 | -1.1596908292 |
| H19 | 2.0870185599  | 0.1026317297  | -1.7941688088 |
| H20 | 3.4051297045  | -0.4833509253 | 3.0055946405  |
| H21 | 0.5671474122  | 2.1476151449  | -1.5497875661 |
| H22 | -0.5261663700 | 2.6958800031  | -3.7017460608 |
| H23 | -2.2807697819 | 1.1963552162  | -4.6353994011 |
| H24 | -2.9339838952 | -0.8528335004 | -3.3801075554 |
| H25 | -1.8391224833 | -1.3898853170 | -1.2140481773 |
| H26 | -0.7911786373 | -0.7830063096 | 5.2512140232  |
| H27 | -1.9318393201 | -0.6245211935 | 3.9049363840  |
| H28 | -0.7368562118 | -1.9542590758 | 3.8960674435  |

Supplementary Material (ESI) for Organic and Biomolecular Chemistry  
This journal is (c) The Royal Society of Chemistry 2012

TS2

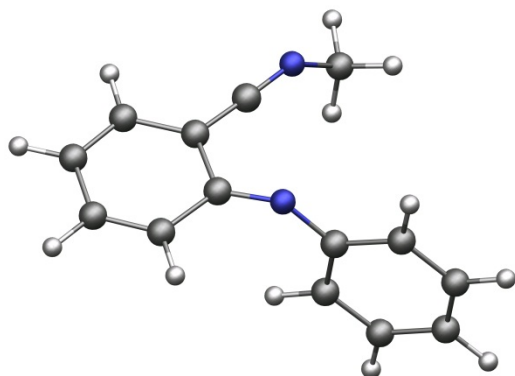

SCF-Energy: -650.106026, total Gibbs free energy (Htot-T\*S): -649.926690

Coordinates:

|     |               |               |               |
|-----|---------------|---------------|---------------|
| C1  | 0.0000000000  | 0.0000000000  | 0.0000000000  |
| N2  | 0.0000000000  | 0.0000000000  | 1.3530434193  |
| C3  | 0.8703435588  | 0.0000000000  | 2.3158249179  |
| C4  | 1.2464140857  | -1.2460569235 | 3.0140267986  |
| C5  | 1.5348985063  | 1.1835096393  | 2.8172529580  |
| C6  | 2.1274100060  | -1.2507455412 | 4.1501944198  |
| C7  | 2.6752506430  | -0.0788951391 | 4.5825412416  |
| C8  | 2.3745974141  | 1.1417484413  | 3.8965027076  |
| C9  | 0.7409944070  | -2.4009253905 | 2.5043526102  |
| N10 | 0.2182988354  | -3.3915763398 | 2.1012457251  |
| C11 | -1.2196214406 | 0.0352150655  | -0.7239574563 |
| C12 | -1.2263545275 | 0.0012083805  | -2.1127182453 |
| C13 | -0.0356273446 | -0.0786585399 | -2.8447862988 |
| C14 | 1.1731499626  | -0.1144327026 | -2.1450985352 |
| C15 | 1.2038990555  | -0.0699917887 | -0.7540890604 |
| C16 | 0.3947090895  | -4.3699392714 | 1.0494485146  |
| H17 | 3.3330867900  | -0.0641372749 | 5.4458704370  |
| H18 | 2.8312996895  | 2.0627659249  | 4.2515925295  |
| H19 | 1.3086362512  | 2.1194883557  | 2.3154054993  |
| H20 | 2.3334772435  | -2.1895911594 | 4.6561136960  |
| H21 | -2.1497502135 | 0.0947175917  | -0.1648254872 |
| H22 | -2.1801555414 | 0.0351285175  | -2.6354847924 |
| H23 | -0.0513110696 | -0.1091093920 | -3.9305364682 |
| H24 | 2.1139590915  | -0.1719044459 | -2.6901467862 |
| H25 | 2.1533957925  | -0.0907922874 | -0.2247630122 |
| H26 | 0.4987590475  | -5.3596703614 | 1.5014798300  |
| H27 | -0.5030000071 | -4.3650164522 | 0.4266734295  |
| H28 | 1.2699863794  | -4.1426316891 | 0.4333400395  |

Supplementary Material (ESI) for Organic and Biomolecular Chemistry  
This journal is (c) The Royal Society of Chemistry 2012

Intermediate 1, cis

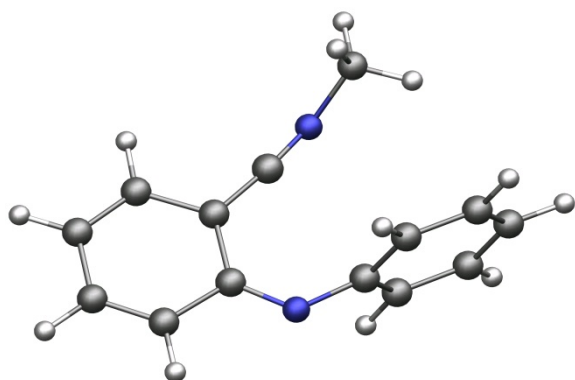

SCF-Energy: -650.131264, total Gibbs free energy (Htot-T\*S): -649.950078

Coordinates:

|     |               |               |               |
|-----|---------------|---------------|---------------|
| C1  | -3.8891213972 | -0.6629429573 | -0.1754654310 |
| C2  | -3.5525273386 | -2.0048803902 | -0.5773449799 |
| C3  | -2.2632016605 | -2.4054062024 | -0.7116450002 |
| C4  | -1.1294885961 | -1.5223057836 | -0.4679590592 |
| C5  | -1.4986468693 | -0.1408159981 | -0.0604455291 |
| C6  | -2.8986059714 | 0.2284132837  | 0.0765314692  |
| N7  | 0.0744583747  | 1.8061176734  | 0.4042613261  |
| C8  | -0.5998548103 | 0.8265018146  | 0.2336007675  |
| N9  | 0.0587252207  | -2.0262646732 | -0.6091382682 |
| C10 | 1.2296501688  | -1.2854368486 | -0.4433926726 |
| C11 | 1.9505663257  | -1.3511816541 | 0.7649731430  |
| C12 | 3.1729455211  | -0.6927824399 | 0.8979951599  |
| C13 | 3.7064858565  | 0.0377539640  | -0.1668099004 |
| C14 | 3.0023907489  | 0.0982412434  | -1.3727941825 |
| C15 | 1.7810509893  | -0.5563136757 | -1.5151183422 |
| C16 | 0.8041069509  | 2.3377400950  | 1.5411065225  |
| H17 | -4.9301671012 | -0.3704504477 | -0.0808484940 |
| H18 | -4.3560142077 | -2.7096413721 | -0.7774424373 |
| H19 | -2.0076030373 | -3.4161338741 | -1.0132695070 |
| H20 | -3.1269643144 | 1.2476740680  | 0.3760847773  |
| H21 | 1.5444923520  | -1.9385396039 | 1.5840858794  |
| H22 | 3.7173991669  | -0.7611927035 | 1.8373310132  |
| H23 | 4.6648000959  | 0.5402394227  | -0.0639452248 |
| H24 | 3.4111790359  | 0.6551703513  | -2.2127432156 |
| H25 | 1.2404560083  | -0.5206648170 | -2.4569406080 |
| H26 | 0.5419521474  | 1.8303377688  | 2.4759583369  |
| H27 | 1.8712035503  | 2.2099078748  | 1.3438967278  |
| H28 | 0.5896066327  | 3.4064272342  | 1.6254239204  |



Supplementary Material (ESI) for Organic and Biomolecular Chemistry  
This journal is (c) The Royal Society of Chemistry 2012

TS3

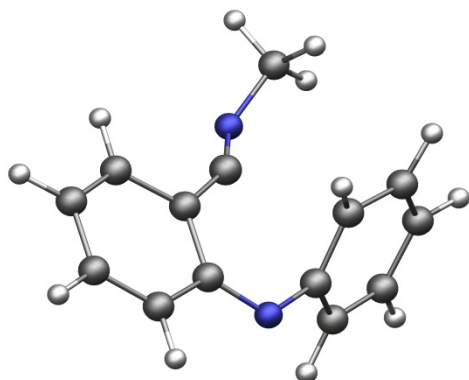

SCF-Energy: -650.112861, total Gibbs free energy (Htot-T\*S): -649.929366

Coordinates:

|     |               |               |               |
|-----|---------------|---------------|---------------|
| C1  | 0.0000000000  | 0.0000000000  | 0.0000000000  |
| C2  | 0.0000000000  | 0.0000000000  | 2.2954840531  |
| C3  | 3.7583336340  | 0.0000000000  | 0.2326551984  |
| C4  | 2.4050470753  | 0.2791696117  | 0.6597722825  |
| C5  | 1.3444659902  | -0.1657231340 | -0.2512838104 |
| C6  | 1.6818393077  | -0.8190306176 | -1.4922287973 |
| N7  | -1.1422275665 | 0.1017094333  | -0.3776405998 |
| C8  | 2.9810728057  | -1.0413940909 | -1.8374237790 |
| N9  | 2.2013284504  | 0.9108815997  | 1.7902030606  |
| C10 | 0.8873949498  | 1.0999156018  | 2.1774118121  |
| C11 | 4.0273255899  | -0.6223001695 | -0.9490127115 |
| C12 | -1.2871846597 | 0.1869758871  | 2.8180879744  |
| C13 | -1.7634986945 | 1.4688764664  | 3.0875731997  |
| C14 | -0.9127955838 | 2.5672784551  | 2.9017205024  |
| C15 | 0.3956522959  | 2.3883861633  | 2.4639244922  |
| C16 | -2.4488383812 | -0.4337017244 | -0.1193435169 |
| H17 | 3.2265878004  | -1.5283912898 | -2.7759178844 |
| H18 | 5.0612439808  | -0.8069720094 | -1.2316549921 |
| H19 | 4.5497398103  | 0.3217890157  | 0.9022919069  |
| H20 | 0.8688946486  | -1.1194776813 | -2.1478403702 |
| H21 | 0.3941869143  | -1.0076194767 | 2.2006210748  |
| H22 | -1.9170062917 | -0.6783382432 | 3.0136582038  |
| H23 | -2.7691946825 | 1.6148002976  | 3.4721763138  |
| H24 | -1.2702554348 | 3.5701967381  | 3.1227581781  |
| H25 | 1.0698384548  | 3.2318956340  | 2.3509162724  |
| H26 | -2.4157816957 | -1.3059422387 | 0.5435468047  |
| H27 | -3.0747408721 | 0.3383301034  | 0.3367075882  |
| H28 | -2.9037750770 | -0.7253251378 | -1.0715534097 |

Supplementary Material (ESI) for Organic and Biomolecular Chemistry  
This journal is (c) The Royal Society of Chemistry 2012

Intermediate 2

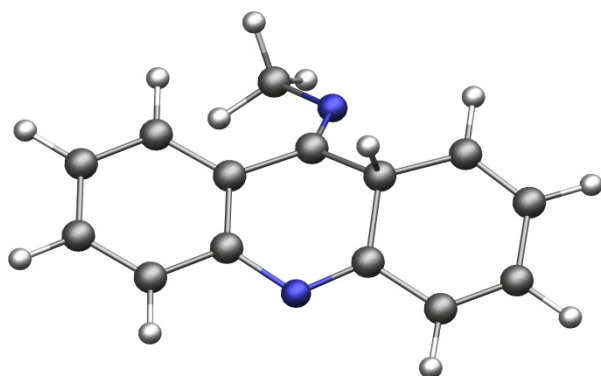

SCF-Energy: -650.158783, total Gibbs free energy (Htot-T\*S): -649.970388

Coordinates:

|     |               |               |               |
|-----|---------------|---------------|---------------|
| C1  | -3.7162184038 | -0.5186126475 | -0.3873015190 |
| C2  | -3.5705147720 | -1.8749525382 | -0.0829643982 |
| C3  | -2.3083762062 | -2.3982679389 | 0.1751271717  |
| C4  | -1.1672771227 | -1.5823592111 | 0.1260103864  |
| C5  | -1.3154578480 | -0.1937496426 | -0.1475581402 |
| C6  | -2.5969895758 | 0.3121099786  | -0.4088617671 |
| N7  | 0.0614906602  | -2.1933895335 | 0.3936049992  |
| C8  | 1.1457352489  | -1.5434533661 | 0.1027407010  |
| C9  | 1.1333380337  | -0.1876128912 | -0.6062814442 |
| C10 | -0.0757326211 | 0.6279694174  | -0.1600722215 |
| C11 | 2.4297783651  | -2.1371984013 | 0.4085561540  |
| C12 | 3.5806419730  | -1.4385242283 | 0.2489883922  |
| C13 | 3.5836092068  | -0.0624228221 | -0.2233080294 |
| C14 | 2.4415467699  | 0.5484132938  | -0.5840710172 |
| N15 | 0.1120139050  | 1.8513463604  | 0.1568352807  |
| H16 | 0.9350744626  | -0.4485267780 | -1.6689950397 |
| C17 | -0.9405685420 | 2.7102226227  | 0.6663806779  |
| H18 | -4.6971840586 | -0.1089837045 | -0.6116489718 |
| H19 | -4.4421835773 | -2.5234127183 | -0.0526287176 |
| H20 | -2.1674833337 | -3.4483728740 | 0.4121229720  |
| H21 | -2.7187467467 | 1.3568296868  | -0.6718902643 |
| H22 | 2.4163849314  | -3.1436890489 | 0.8153209371  |
| H23 | 4.5301713961  | -1.8968348426 | 0.5145900389  |
| H24 | 4.5289473984  | 0.4727718394  | -0.2561209151 |
| H25 | 2.4210960256  | 1.5868312688  | -0.8947585949 |
| H26 | -0.4885379350 | 3.4225346485  | 1.3657930412  |
| H27 | -1.3761029545 | 3.3024176519  | -0.1505091150 |
| H28 | -1.7547981942 | 2.1823481082  | 1.1804719489  |

Supplementary Material (ESI) for Organic and Biomolecular Chemistry  
This journal is (c) The Royal Society of Chemistry 2012

TS4

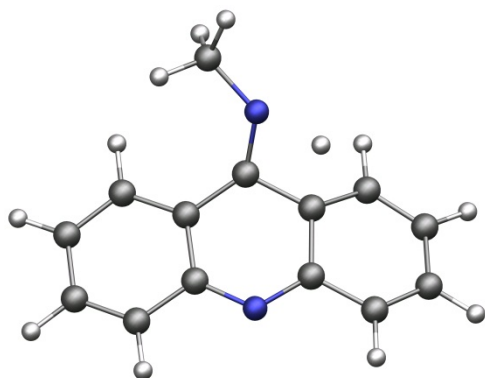

SCF-Energy: -650.089371, total Gibbs free energy (Htot-T\*S): -649.907016

Coordinates:

|     |               |               |               |
|-----|---------------|---------------|---------------|
| N1  | 0.0520316792  | 0.1080994059  | 0.0905244715  |
| H2  | -0.1547376058 | 0.1663259730  | 1.5362627639  |
| C3  | 4.8289682072  | 0.0594608267  | 0.6011812580  |
| C4  | 3.5001847156  | 0.2745423480  | 1.0420134137  |
| C5  | 2.5257304215  | 0.6168628100  | 0.0391901597  |
| C6  | 2.9108726643  | 0.7833842679  | -1.3068210966 |
| N7  | 3.2487980979  | 0.1493452104  | 2.3880302523  |
| C8  | 2.0683765060  | 0.5368593298  | 2.8505159866  |
| C9  | 0.9548360613  | 0.9028097695  | 1.9767469230  |
| C10 | 1.1745947108  | 0.6139201735  | 0.5406757703  |
| C11 | 1.8743987926  | 0.7399322341  | 4.2586172990  |
| C12 | 0.8449343204  | 1.5240660798  | 4.7073330116  |
| C13 | -0.0751821371 | 2.1517720612  | 3.8069437139  |
| C14 | 0.0037310665  | 1.8945074038  | 2.4682311372  |
| C15 | 4.2307765652  | 0.6085741110  | -1.6874806662 |
| C16 | 5.1855773723  | 0.2305407218  | -0.7239047874 |
| C17 | -0.2451438960 | -0.2545674542 | -1.2808891278 |
| H18 | 4.5252054629  | 0.7533018784  | -2.7228999176 |
| H19 | 6.2192422065  | 0.0784594789  | -1.0248019253 |
| H20 | 5.5615549578  | -0.2176954913 | 1.3527123800  |
| H21 | 2.1678963053  | 1.0775222788  | -2.0425323443 |
| H22 | 2.6351706717  | 0.3569337731  | 4.9317736974  |
| H23 | 0.7495747665  | 1.7205205024  | 5.7725935494  |
| H24 | -0.8334883681 | 2.8267511409  | 4.1913238007  |
| H25 | -0.7024933498 | 2.3224658921  | 1.7611090187  |
| H26 | -1.0608424159 | -0.9830291079 | -1.2852027384 |
| H27 | 0.6335326593  | -0.7016495947 | -1.7652892855 |
| H28 | -0.5626870773 | 0.6127919282  | -1.8760608271 |

Supplementary Material (ESI) for Organic and Biomolecular Chemistry  
This journal is (c) The Royal Society of Chemistry 2012

Product **9a**

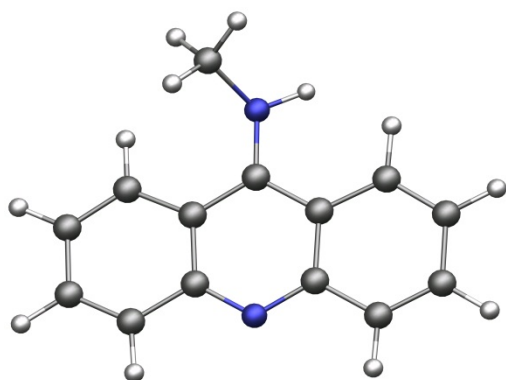

SCF-Energy: -650.210954, total Gibbs free energy (Htot-T\*S): -649.021279

Coordinates:

|     |               |               |               |
|-----|---------------|---------------|---------------|
| C1  | -3.6806809439 | -0.4145567350 | -0.0787907087 |
| C2  | -3.5635186199 | -1.7860317805 | 0.2786085341  |
| C3  | -2.3279462774 | -2.3629119445 | 0.4018198738  |
| C4  | -1.1319113516 | -1.6060348088 | 0.1947931562  |
| C5  | -1.2496283903 | -0.1957436262 | -0.0867146998 |
| C6  | -2.5580677600 | 0.3535479922  | -0.2563601206 |
| N7  | 0.0354706292  | -2.2674473075 | 0.2446411207  |
| C8  | 1.1570583610  | -1.5647740891 | 0.0183472044  |
| C9  | 1.1853337698  | -0.1406168426 | -0.2099558473 |
| C10 | -0.0553739470 | 0.5577697220  | -0.2416923013 |
| C11 | 2.3956390244  | -2.2797898988 | 0.0328266228  |
| C12 | 3.5910192356  | -1.6366050062 | -0.1467148149 |
| C13 | 3.6231974143  | -0.2281805593 | -0.3356732004 |
| C14 | 2.4561599698  | 0.4932763614  | -0.3587434318 |
| C15 | -0.8641120989 | 2.8669051168  | 0.3469228614  |
| N16 | -0.0889907471 | 1.9254460514  | -0.4629957939 |
| H17 | -4.6650360678 | 0.0206608018  | -0.2287586784 |
| H18 | -4.4612160778 | -2.3806820448 | 0.4278753616  |
| H19 | -2.2059103500 | -3.4156101406 | 0.6373153375  |
| H20 | -2.6658798034 | 1.3852750080  | -0.5696115019 |
| H21 | 2.3384023529  | -3.3517486251 | 0.1945401210  |
| H22 | 4.5216873262  | -2.1978889226 | -0.1329686908 |
| H23 | 4.5774076226  | 0.2789202686  | -0.4492291835 |
| H24 | 2.5228719494  | 1.5716786825  | -0.4787087431 |
| H25 | -1.6223917098 | 3.3957284485  | -0.2444315155 |
| H26 | -0.1956968919 | 3.6162307109  | 0.7877427858  |
| H27 | -1.3659683975 | 2.3433051600  | 1.1632883970  |
| H28 | 0.7944531465  | 2.3061942890  | -0.7663864206 |
